# Supplementary material for: Pan-cancer atlas of somatic core and linker histone mutations
Source: Springer Nature journal article supplement (doi:10.1038/s41525-023-00367-8), 2023-08-28
Supplement: MOESM1 [file 41525_2023_367_MOESM1_ESM.pdf]

## **Supplementary Material**

**Supplementary Data File 1. Histone mutations in TCGA, ICGC PCAWG, and PBTA datasets.** This table lists all histone gene mutations found among TCGA, ICGC PCAWG, and PBTA datasets that passed variant calling and filtering criteria (described in **Methods**). The unique patient identifier (ID), histone gene, and amino acid change are listed for each mutation.

| ACC        |                     |                       |
|------------|---------------------|-----------------------|
| Subtype    | Core histone mutant | Core histone wildtype |
| COC1       | 1                   | 32                    |
| COC2       | 2                   | 17                    |
| COC3       | 6                   | 18                    |
| NA*        | 1                   | 14                    |
|            |                     |                       |
| Chi-Square | 6.466               |                       |
| df         | 2                   |                       |
| p-value    | 0.0394              |                       |

| UCS        |                     |                       |
|------------|---------------------|-----------------------|
| Subtype    | Core histone mutant | Core histone wildtype |
| POLE       | 0                   | 17                    |
| MSI        | 5                   | 59                    |
| CN low     | 11                  | 79                    |
| CN high    | 11                  | 48                    |
| NA*        | 7                   | 120                   |
|            |                     |                       |
| Chi-Square | 5.949               |                       |
| df         | 3                   |                       |
| p-value    | 0.1141              |                       |

| Mesothelioma |                       |                         |
|--------------|-----------------------|-------------------------|
| Subtype      | Linker histone mutant | Linker histone wildtype |
| iCluster 1   | 2                     | 18                      |
| iCluster 2   | 0                     | 15                      |
| iCluster 3   | 0                     | 19                      |
| iCluster 4   | 0                     | 19                      |
|              |                       |                         |
| Chi-Square   | 5.449                 |                         |
| df           | 3                     |                         |
| p-value      | 0.1417                |                         |

**Supplementary Data File 2. Chi-square analyses of histone mutation frequencies among ACC, UCS, and mesothelioma prognostic subtypes.** This table lists the number of histone mutant subjects belonging to each previously defined prognostic subtype for ACC(28), UCS(29), and mesothelioma(30) cohorts from

the TCGA dataset. Chi-square tests were performed to compare histone mutation frequencies among ACC, UCS, and mesothelioma prognostic subtypes and the Chi-square statistics, degrees of freedom (df), and p-values are listed below the corresponding subject counts. \*Subjects without available prognostic subtype data ('NA') were excluded from the Chi-square analyses.

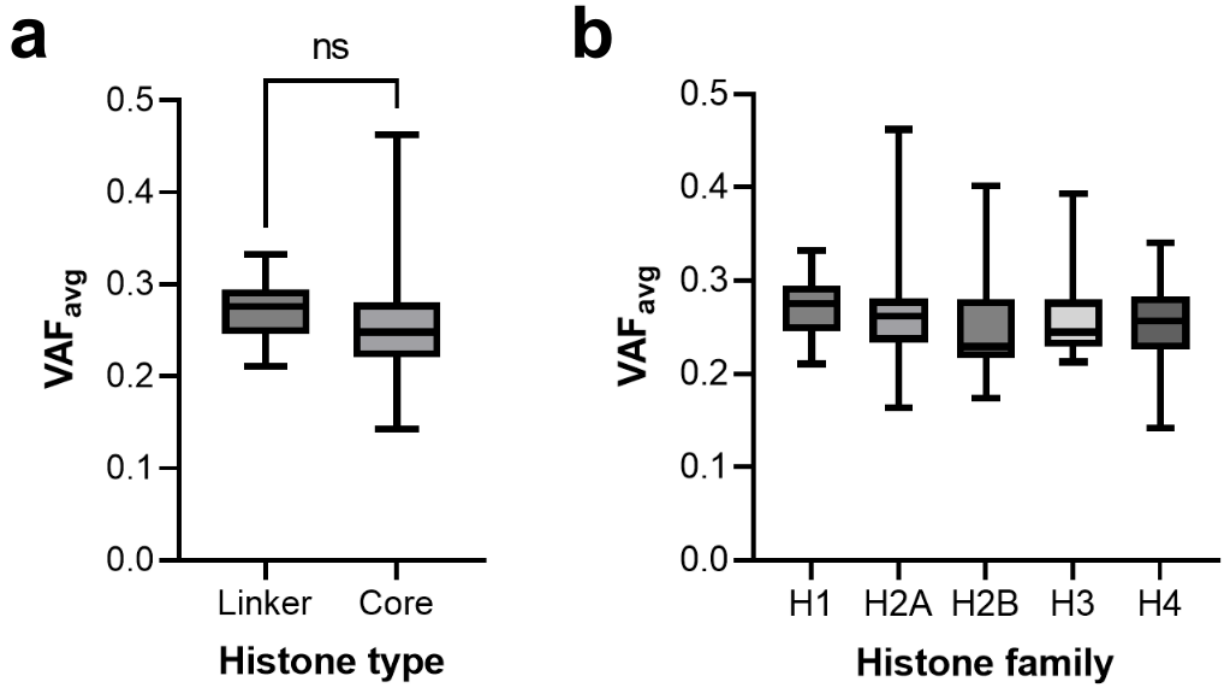

**Supplementary Figure 1. Comparison of VAFs between histone families.** (A) Box plots showing the VAF distributions of mutations affecting linker histone relative to core histone genes (Mann-Whitney test,  $p > 0.05$ ). (B) Box plots showing VAFs distributions for each histone family (H1, H2A, H2B, H3, H4). Upper and lower quartiles and medians are shown.

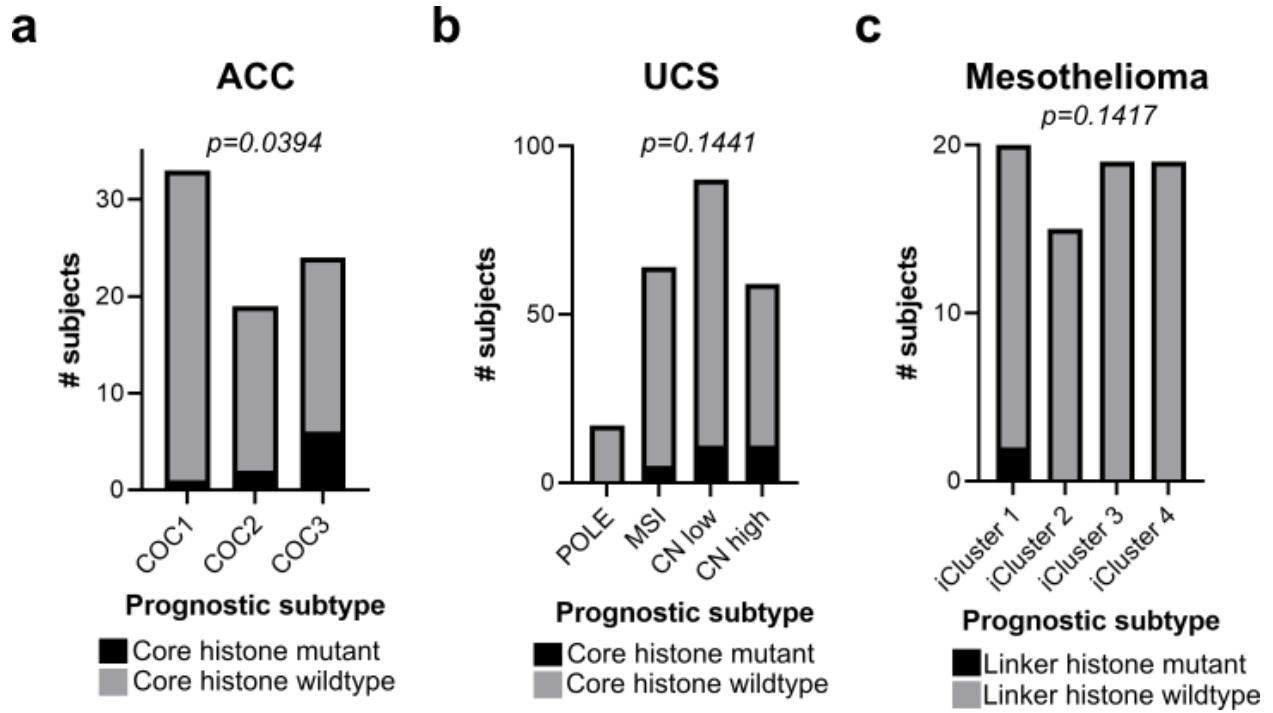

**Supplementary Figure 2. Enrichment of histone mutations in prognostic molecular subtypes of ACC, UCS, and mesothelioma.** Black bars show the number of subjects with mutant histone genes and grey bars show the number of subjects with wildtype histone genes. P values are based on Chi-square tests.

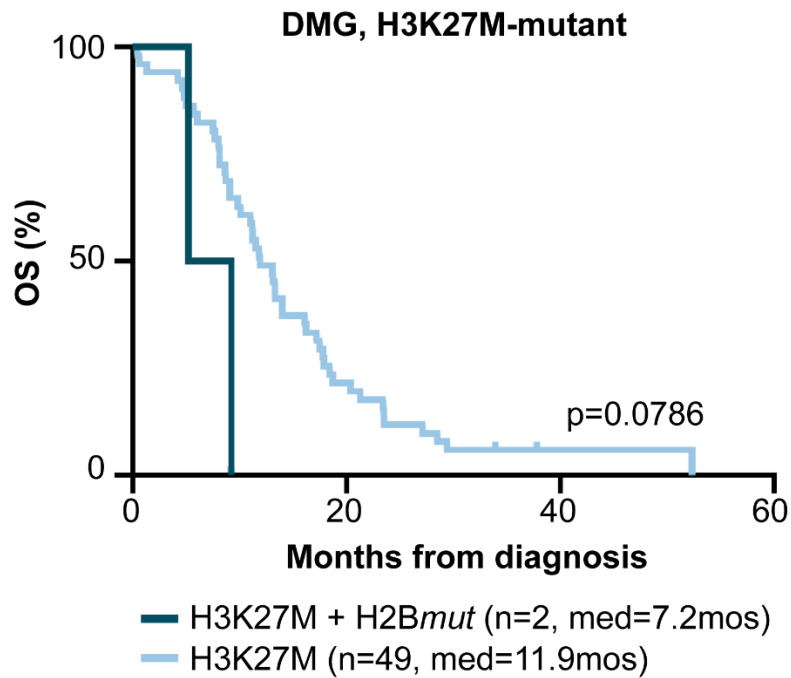

**Supplementary Figure 3. Clinical implications of H2B mutations in DMG, H3 K27M mutant.** Kaplan-Meier overall survival curve showing trend towards shorter survival outcomes in two DMG patients harboring co-occurring H3 K27M and H2B mutations, when compared to DMG harboring H3 K27M without additional histone gene alterations (n=49). P=0.0786, log-rank Mantel-Cox test.

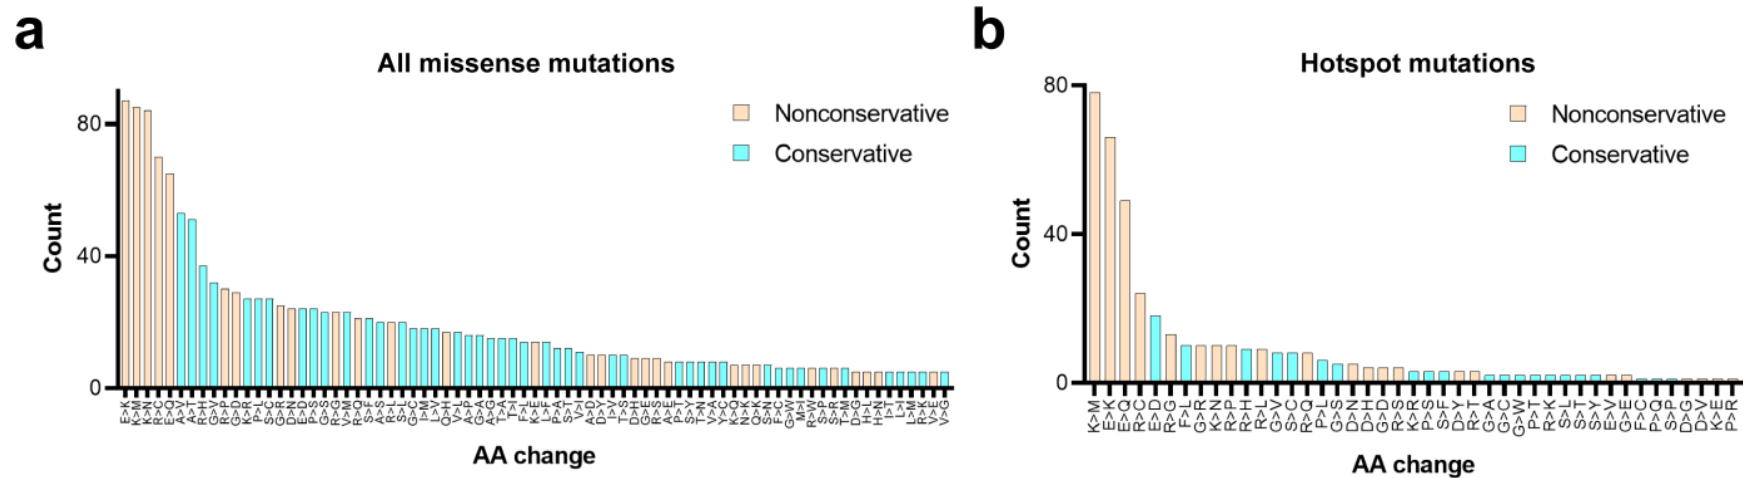

**Supplementary Figure 4. Amino acid changes resulting from missense mutations to histone proteins. (A)** Number of missense mutation events (count, y-axis) resulting in conservative vs. nonconservative substitutions. Cut-off at amino acid changes (AA change) with 5+ mutation counts. **(B)** Substitutions resulting from hotspot missense mutations.
